# Supplementary material for: Development of a nomogram to predict 30-day mortality of patients with sepsis-associated encephalopathy: a retrospective cohort study
Source: PubMed Central journal article supplement (PMC7331133; doi:10.1186/s40560-020-00459-y), 2020-07-02
Supplement: 40560_2020_459_MOESM2_ESM.pdf [file 40560_2020_459_MOESM2_ESM.pdf]

**Table S1 Factors independently associated with 30-day mortality of patients with sepsis in the multivariate logistic analysis**

| <b>Variables</b>              | <b>OR</b> | <b>95% CI</b> |      | <b>P value</b> |
|-------------------------------|-----------|---------------|------|----------------|
| SAE                           | 1.26      | 1.07          | 1.49 | 0.005          |
| Age (years)                   | 1.04      | 1.03          | 1.04 | <0.001         |
| Hypertension                  | 0.76      | 0.64          | 0.89 | <0.001         |
| Chronic pulmonary disease     | 1.22      | 1.02          | 1.46 | 0.033          |
| Liver disease                 | 1.39      | 1.02          | 1.87 | 0.034          |
| Lactate (mmol/L)              | 1.13      | 1.07          | 1.19 | <0.001         |
| PO2 (mmHg)                    | 1.00      | 1.00          | 1.00 | 0.006          |
| WBC (K/uL)                    | 1.01      | 1.00          | 1.01 | 0.010          |
| Creatinine (K/uL)             | 0.93      | 0.86          | 0.99 | 0.032          |
| BUN (K/uL)                    | 1.01      | 1.00          | 1.01 | <0.001         |
| Hemoglobin (g/dL)             | 0.95      | 0.91          | 0.99 | 0.016          |
| Bilirubin (EU/dL)             | 1.04      | 1.02          | 1.07 | <0.001         |
| RDW (%)                       | 1.14      | 1.10          | 1.19 | <0.001         |
| MCV (fL)                      | 1.02      | 1.01          | 1.03 | <0.001         |
| Mean heartrate (min-1)        | 1.01      | 1.00          | 1.01 | 0.006          |
| Mean respiratory rate (min-1) | 1.07      | 1.05          | 1.09 | <0.001         |
| Mean temperature (°C)         | 0.72      | 0.63          | 0.82 | <0.001         |
| Mean SpO2 (%)                 | 0.96      | 0.92          | 0.99 | 0.014          |
| Mechanical ventilation        | 1.80      | 1.38          | 2.34 | <0.001         |
| Vasopressor                   | 2.05      | 1.73          | 2.43 | <0.001         |

BUN, blood urea nitrogen; RDW, red blood cell distribution widths; MCV, mean corpuscular volume.

Hosmer-Lemeshow test: p=0.853.
