# Supplementary material for: Development of a nomogram to predict 30-day mortality of patients with sepsis-associated encephalopathy: a retrospective cohort study
Source: PubMed Central journal article supplement (PMC7331133; doi:10.1186/s40560-020-00459-y), 2020-07-02
Supplement: 40560_2020_459_MOESM6_ESM.pdf [file 40560_2020_459_MOESM6_ESM.pdf]

**Table S2 Baseline characteristics of patients in the training and validation sets <sup>a</sup>**

| <b>Variable</b>             | <b>SAE patients<br/>n=2474</b> | <b>Training set<br/>n=1731</b> | <b>Validation set<br/>n=743</b> | <b>P value</b> |
|-----------------------------|--------------------------------|--------------------------------|---------------------------------|----------------|
| Age, years                  | 73 [58, 83]                    | 73 [57, 83]                    | 73 [58.5, 83.0]                 | 0.654          |
| Gender, male                | 1246 (50.36)                   | 864 (49.91)                    | 382 (51.41)                     | 0.522          |
| <b>Ethnicity, n(%)</b>      |                                |                                |                                 | 0.873          |
| White                       | 1855 (74.98)                   | 1291 (74.58)                   | 564 (75.91)                     |                |
| Black                       | 214 (8.65)                     | 148 (8.55)                     | 66 (8.88)                       |                |
| Hispanic or Latino          | 67 (2.71)                      | 49 (2.83)                      | 18 (2.42)                       |                |
| Asian                       | 50 (2.02)                      | 37 (2.14)                      | 13 (1.75)                       |                |
| Others                      | 288 (11.64)                    | 206 (11.90)                    | 82 (11.04)                      |                |
| <b>Comorbidity, n(%)</b>    |                                |                                |                                 |                |
| Cardiovascular diseases     | 1359 (54.93)                   | 943 (54.48)                    | 416 (55.99)                     | 0.517          |
| Peripheral vascular disease | 253 (10.23)                    | 180 (10.40)                    | 73 (9.83)                       | 0.476          |
| Other neurological Diseases | 494 (19.97)                    | 350 (20.22)                    | 144 (19.39)                     | 0.672          |
| Hypertension                | 1276 (51.58)                   | 886 (51.18)                    | 390 (52.49)                     | 0.581          |
| Chronic Pulmonary Disease   | 543 (21.95)                    | 375 (21.66)                    | 168 (22.61)                     | 0.639          |
| Diabetes                    | 460 (18.59)                    | 308 (17.79)                    | 152 (20.46)                     | 0.132          |
| Hypothyroidism              | 307 (12.41)                    | 210 (12.13)                    | 97 (13.06)                      | 0.567          |
| Liver Disease               | 206 (8.33)                     | 149 (8.61)                     | 57 (7.67)                       | 0.488          |
| Coagulopathy                | 404 (16.33)                    | 283 (16.35)                    | 121 (16.29)                     | 1.00           |
| Anemias                     | 678 (27.41)                    | 478 (27.61)                    | 200 (26.92)                     | 0.759          |

<sup>a</sup> Continuous data are presented as median (interquartile range), whereas categorical data are presented as frequency (percentage).
