# Supplementary material for: Development of a nomogram to predict 30-day mortality of patients with sepsis-associated encephalopathy: a retrospective cohort study
Source: PubMed Central journal article supplement (PMC7331133; doi:10.1186/s40560-020-00459-y), 2020-07-02
Supplement: 40560_2020_459_MOESM7_ESM.pdf [file 40560_2020_459_MOESM7_ESM.pdf]

**Table S3 Characteristics at ICU admission in the training and validation sets <sup>a</sup>**

| <b>Variable</b>                            | <b>SAE patients<br/>n=2474</b> | <b>Training set<br/>n=1731</b> | <b>Validation set<br/>n=743</b> | <b>P value</b> |
|--------------------------------------------|--------------------------------|--------------------------------|---------------------------------|----------------|
| Hospital stay time, days                   | 10.9 [6.4, 19.6]               | 11.2 [6.4, 19.6]               | 10.7 [6.5, 19.7]                | 0.828          |
| ICU stay time, days                        | 3 [1.8, 6.3]                   | 3.1 [1.8, 6.6]                 | 3.0 [1.7, 6.0]                  | 0.719          |
| 30-day mortality, n (%)                    | 527 (21.30)                    | 368 (21.26)                    | 159 (21.40)                     | 0.980          |
| Mechanical ventilation, n(%)               | 209 (8.45)                     | 153 (8.84)                     | 56 (7.54)                       | 0.323          |
| Vasopressor, n (%)                         | 577 (23.33)                    | 421 (24.32)                    | 156 (21.00)                     | 0.082          |
| <b>First careunit, n(%)</b>                |                                |                                |                                 | 0.489          |
| CCU                                        | 233 (9.42)                     | 164 (9.47)                     | 69 (9.29)                       |                |
| CSRU                                       | 233 (9.01)                     | 147 (8.49)                     | 76 (10.23)                      |                |
| MICU                                       | 1295 (52.34)                   | 918 (53.03)                    | 377 (50.74)                     |                |
| SICU                                       | 413 (16.69)                    | 293 (16.93)                    | 120 (16.15)                     |                |
| TSICU                                      | 310 (12.53)                    | 209 (12.07)                    | 101 (13.59)                     |                |
| <b>Severe Score <sup>b</sup></b>           |                                |                                |                                 |                |
| Modified SOFA                              | 3 [2,5]                        | 3 [2,6]                        | 3 [2,5]                         | 0.415          |
| Modified SAPSII                            | 37.44±11.97                    | 37.42±11.81                    | 37.48±12.39                     | 0.916          |
| GCS score                                  | 11.45±3.21                     | 11.42±3.22                     | 11.52±3.19                      | 0.464          |
| <b>Vital signs <sup>c</sup></b>            |                                |                                |                                 |                |
| Mean heartrate (min <sup>-1</sup> )        | 89.25±16.54                    | 89.33±16.54                    | 89.08±16.56                     | 0.726          |
| Mean arterial pressure (mmHg)              | 75.63±10.91                    | 75.57±10.60                    | 75.76±11.59                     | 0.709          |
| Mean respiratory rate (min <sup>-1</sup> ) | 20.07±4.31                     | 20.10±4.37                     | 20.00±4.15                      | 0.586          |
| Mean temperature(°C)                       | 36.87±0.66                     | 36.88±0.66                     | 36.87±0.66                      | 0.860          |
| Mean SpO2(%)                               | 97.3 [96.0, 98.4]              | 97.2 [95.9, 98.4]              | 97.4 [96.0, 98.5]               | 0.212          |
| <b>Laboratory tests <sup>d</sup></b>       |                                |                                |                                 |                |
| Lactate (mmol/L)                           | 1.5 [1.1, 2.2]                 | 1.5 [1.1, 2.3]                 | 1.6 [1.1, 2.2]                  | 0.459          |
| PCO <sub>2</sub> (mmHg)                    | 40 [35,47]                     | 40 [35,47]                     | 40 [35,47]                      | 0.804          |
| PO <sub>2</sub> (mmHg)                     | 103 [73,175]                   | 104 [73,179]                   | 100 [73,166]                    | 0.449          |
| PH                                         | 7.378±0.092                    | 7.377±0.092                    | 7.380±0.092                     | 0.514          |
| Creatinine (K/uL)                          | 1.1 [0.8, 1.6]                 | 1.1 [0.8, 1.6]                 | 1.1 [0.8, 1.7]                  | 0.236          |
| BUN (K/uL)                                 | 23 [15,38]                     | 23 [15,38]                     | 23 [15,37]                      | 0.373          |
| ALT <sup>e</sup>                           | 1.4 [1.2, 1.7]                 | 1.4 [1.2, 1.7]                 | 1.4 [1.2, 1.7]                  | 0.726          |
| AST <sup>f</sup>                           | 1.5 [1.3, 1.8]                 | 1.5 [1.3, 1.8]                 | 1.5 [1.3, 1.8]                  | 0.708          |
| Bilirubin (EU/dL)                          | 0.6 [0.4, 1.1]                 | 0.6 [0.4, 1.1]                 | 0.6 [0.4, 1.1]                  | 0.853          |
| Hemoglobin (g/dL)                          | 11.49±2.19                     | 11.50±2.18                     | 11.47±2.21                      | 0.758          |
| Platelet (K/uL)                            | 232 [167,308]                  | 231 [164.5, 307.0]             | 238 [170.0, 310.5]              | 0.330          |
| Potassium (K/uL)                           | 4.2 [3.8, 4.7]                 | 4.2 [3.8, 4.7]                 | 4.2 [3.8, 4.6]                  | 0.242          |
| Sodium (K/uL)                              | 138 [135,141]                  | 138 [135,141]                  | 138 [135,141]                   | 0.937          |
| PT (sec)                                   | 13.8 [12.8, 16.0]              | 13.9 [12.8, 16.1]              | 13.7 [12.8, 15.9]               | 0.270          |
| RDW (%)                                    | 15.29±2.21                     | 15.30±2.23                     | 15.26±2.17                      | 0.621          |
| WBC (K/uL)                                 | 10.8 [7.3, 15.1]               | 10.7 [7.30, 15.05]             | 10.8 [7.3, 15.3]                | 0.803          |
| Lymphocyte (%)                             | 9.6 [5.8, 16.3]                | 9.8 [5.9, 16.5]                | 9.0 [5.55, 16.10]               | 0.238          |

|                             |                      |               |                   |       |
|-----------------------------|----------------------|---------------|-------------------|-------|
| Neutrophil (%)              | 81.15 [72.13, 88.00] | 81.2 [72, 88] | 81 [72.85, 88.75] | 0.580 |
| MCV (fL)                    | 91 [86,95]           | 90 [86,95]    | 91 [86,95]        | 0.151 |
| <b>Infection site, n(%)</b> |                      |               |                   |       |
| Urine                       | 1224 (49.47)         | 847 (48.93)   | 377 (50.74)       | 0.435 |
| Blood                       | 640 (25.87)          | 438 (25.30)   | 202 (27.19)       | 0.352 |
| Lung                        | 825 (33.35)          | 579 (33.45)   | 246 (33.11)       | 0.906 |
| Catheter                    | 114 (4.61)           | 85 (4.91)     | 29 (3.90)         | 0.322 |
| Gastrointestinal tract      | 154 (6.22)           | 97 (5.60)     | 57 (7.67)         | 0.063 |
| Abdominal cavity            | 55 (2.22)            | 37 (2.14)     | 18 (2.42)         | 0.770 |
| Skin/Soft tissue            | 424 (17.14)          | 289 (16.70)   | 135 (18.17)       | 0.405 |
| Others                      | 68 (2.75)            | 44 (2.54)     | 24 (3.23)         | 0.409 |
| <b>Microorganisms, n(%)</b> |                      |               |                   |       |
| Gram-positive               | 1265 (51.13)         | 888 (51.30)   | 377 (50.74)       | 0.833 |
| Gram-negative               | 984 (39.77)          | 678 (39.17)   | 306 (41.18)       | 0.371 |
| Fungus                      | 699 (28.25)          | 487 (28.13)   | 212 (28.53)       | 0.878 |

<sup>a</sup> Parametric continuous data are presented as mean  $\pm$  standard deviation (SD), non-parametric continuous data are presented as median (interquartile ranges), whereas categorical data are presented as frequency (percentage)

<sup>b</sup> Severe score is calculated on the first day of each ICU patients' stay

<sup>c</sup> Vital signs is calculated on the first 24 hours of each ICU patients' stay

<sup>d</sup> Laboratory tests recorded the first result of each patients' ICU stay

<sup>e</sup> ALT in the table is the value after logarithmic transformation

<sup>f</sup> ALT in the table is the value after logarithmic transformation

CCU, coronary care unit; CSRU, cardiac surgical intensive care unit; MICU, medical intensive care unit; SICU, surgical intensive care unit; TSICU, trauma/surgical intensive care unit; SOFA, sequential organ failure assessment; SAPSII, the simplified acute physiology score; GCS, the Glasgow Coma Score; RDW, red blood cell distribution widths; MCV, mean corpuscular volume.
