# Supplementary material for: Development of a nomogram to predict 30-day mortality of patients with sepsis-associated encephalopathy: a retrospective cohort study
Source: PubMed Central journal article supplement (PMC7331133; doi:10.1186/s40560-020-00459-y), 2020-07-02
Supplement: 40560_2020_459_MOESM11_ESM.pdf [file 40560_2020_459_MOESM11_ESM.pdf]

**Table S4 Comparison of models in predicting the 30-day mortality of SAE<sup>a</sup>**  
**(Sensitivity analysis)**

| Predictive Model      |          | AUROC               | P value | IDI                 | P value | Brier index         | P value |
|-----------------------|----------|---------------------|---------|---------------------|---------|---------------------|---------|
|                       | Nomogram | 0.741 [0.709-0.773] |         |                     |         | 0.182[0.170-0.195]  |         |
| <b>Sensitivity(1)</b> | SOFA     | 0.611 [0.573-0.648] | <0.001  | 0.122 [0.101-0.144] | <0.001  | 0.208 [0.197-0.219] | <0.001  |
|                       | LODS     | 0.637 [0.601-0.674] | <0.001  | 0.103 [0.079-0.127] | <0.001  | 0.204 [0.193-0.216] | <0.001  |
|                       | Nomogram | 0.744 [0.694-0.794] |         |                     |         | 0.167 [0.148-0.186] |         |
| <b>Sensitivity(2)</b> | SOFA     | 0.583 [0.525-0.640] | <0.001  | 0.135 [0.103-0.166] | <0.001  | 0.193 [0.174-0.212] | <0.001  |
|                       | LODS     | 0.607 [0.548-0.667] | <0.001  | 0.113 [0.082-0.144] | <0.001  | 0.188 [0.169-0.207] | <0.001  |

<sup>a</sup>The P value was drawn by comparing the results of nomogram with SOFA or LODS.

SOFA, sequential organ failure assessment; AUROC, area under the receiver operating characteristic curve; IDI, integrated discrimination improvement.
